# Supplementary material for: CRITER 1.0: A coarse reconstruction with iterative refinement network for sparse spatio-temporal satellite data
Source: Copernicus journal article supplement (doi:10.5194/gmd-2024-208), 2025-02-06
Supplement: Supplementary file [file gmd-2024-208-AC3-supplement.pdf]

## Response to referee comment 2

(<https://doi.org/10.5194/gmd-2024-208-RC2>)

### General comment

The paper by Matjaž Zupančič Muc et al. (2025) presents a novel ML-based architecture, which includes the combination of a Vision Transformer model with a U-Net, to reconstruct satellite-derived sea surface temperature values not measured by infrared sensors, mostly due to cloud coverage.

While the technical parts concerning the networks involved are mostly well explained and exhaustive, I think there is a lack of attention when dealing with the datasets involved and the presentation of the results. I suggest publication after addressing some majors concerns explained in details below.

[We thank the reviewer for their thoughtful and constructive feedback. Below, we provide a detailed, comment-by-comment response addressing each point raised.](#)

### Specific comments:

**Comment 1:** Already in the abstract the authors refer to the difficulties “to accurately recover high-frequency variability, particularly in SST gradients in ocean fronts, eddies, and filaments, which are crucial for downstream processing and predictive tasks”, but there is no mention in the paper to some evaluation of SST gradients or the scales that the network is able to resolve (e.g., not a single plot of SST gradients or some spectra). Only RMSE is not sufficient, since it is possible to improve the RMSE of a reconstruction only at large scales. I think the authors should present some plots and some metrics that can show if the network effectively resolves the small scales (i.e., submesoscale and mesoscale) of the ocean.

**Response 1:** [We appreciate the reviewer's insightful comment regarding the need to evaluate small-scale feature reconstruction. To address this, we've added a spatial spectral analysis comparing Power Spectral Densities \(PSD\) of ground-truth SST fields against CRITER and DINCAE2 reconstructions, following established methodologies \(Fanelli et al., 2024; Goh et al., 2024\). Our analysis focuses on the Ionian Sea - a relatively large region with significant SST variability - using observation-rich target fields to compute ground truth PSDs. Through systematic cloud mask sampling, we demonstrate that CRITER's PSD consistently aligns closer to ground truth than DINCAE2, particularly for wavenumbers corresponding to small-scale features.](#)

[These results are presented in a new Section 4.3.2 \("Spatial Spectral Analysis"\) with supporting Figures 7. And Figure 8, which include: \(i\) target SST fields and reconstructed outputs, \(ii\) corresponding gradient magnitude visualizations, \(iii\) PSD comparisons across scales and](#)

sampled clouds. Additional analyses, including edge cases and failure scenarios, are provided in Appendix C1 ("Extended Spatial Spectral Analysis").

#### 4.3.2 Spatial Spectral Analysis

We conduct spatial spectral analysis by comparing the Power Spectral Density (PSD) of ground-truth observations against reconstructions from CRITER and DINCAE2, focusing on the Ionian Sea region due to its significant SST variability.

First, we identify observation fields with maximum number of known measurements within the ROI (Region Of Interest) and compute their PSDs over the ROI. Following Fanelli et al. (2024), we compute PSD using FFT with a Blackman-Harris window. We then sample 30 cloud masks with distinct coverage over the ROI, with the fraction of missing values ranging from 50% to 98%. For each mask, we simulate missing data in the observation fields, reconstruct them using both methods, and compute PSD over the reconstructed ROI.

Figure 7 shows an observation sequence with few available measurements. Both methods maintain PSD values near the target at low wavenumbers, indicating comparable low-frequency reconstruction. For wavenumbers  $k \geq 4 \frac{\text{cycles}}{\text{deg}}$ , however, CRITER's PSD remains closer to the target than DINCAE2's, demonstrating its superior ability to resolve high-frequency components. Figure 8 depicts a case with more measurements, where both methods generally align closer to the target. Nevertheless, CRITER still outperforms DINCAE2 at high wavenumbers ( $k \geq 5 \frac{\text{cycles}}{\text{deg}}$ ). Additional results are provided in Appendix C1.

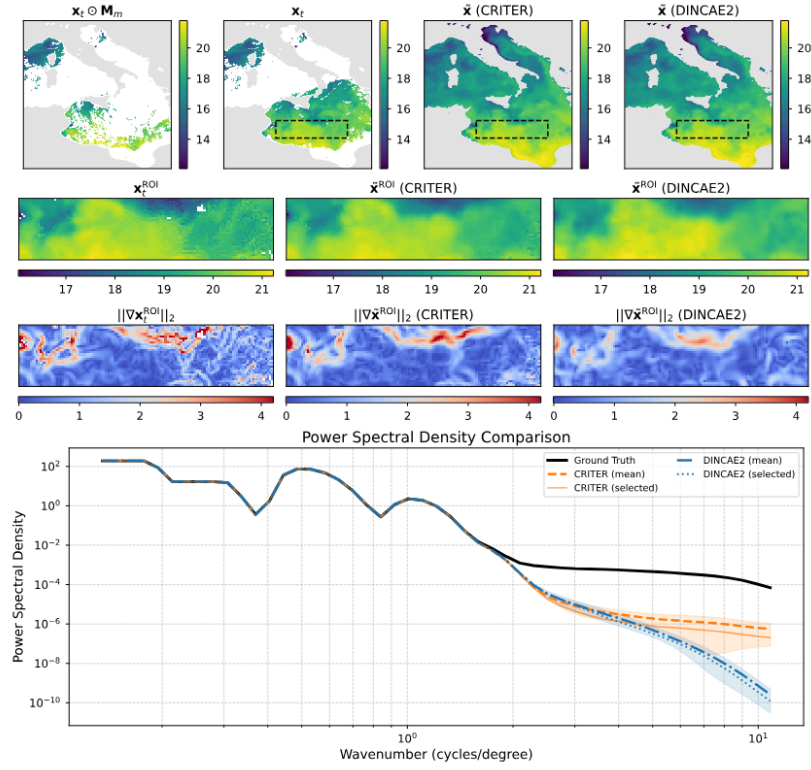

**Figure 7.** Visualization of reconstruction performance: Row 1 shows the full fields (left-to-right: Masked SST, Target SST, CRITER reconstruction, DINCAE2 reconstruction) with the Region of Interest (ROI) marked by a black-dashed rectangle. Row 2 displays the corresponding ROI fields: Target SST, CRITER reconstruction, and DINCAE2 reconstruction. Row 3 presents gradient magnitudes within the ROI for target, CRITER, and DINCAE2 outputs. Row 4 compares Power Spectral Densities: Target ROI (black), CRITER mean  $\pm$  std (orange band), DINCAE2 mean  $\pm$  std (blue band), with solid orange and dotted blue lines showing CRITER's and DINCAE2's PSDs for the selected example.

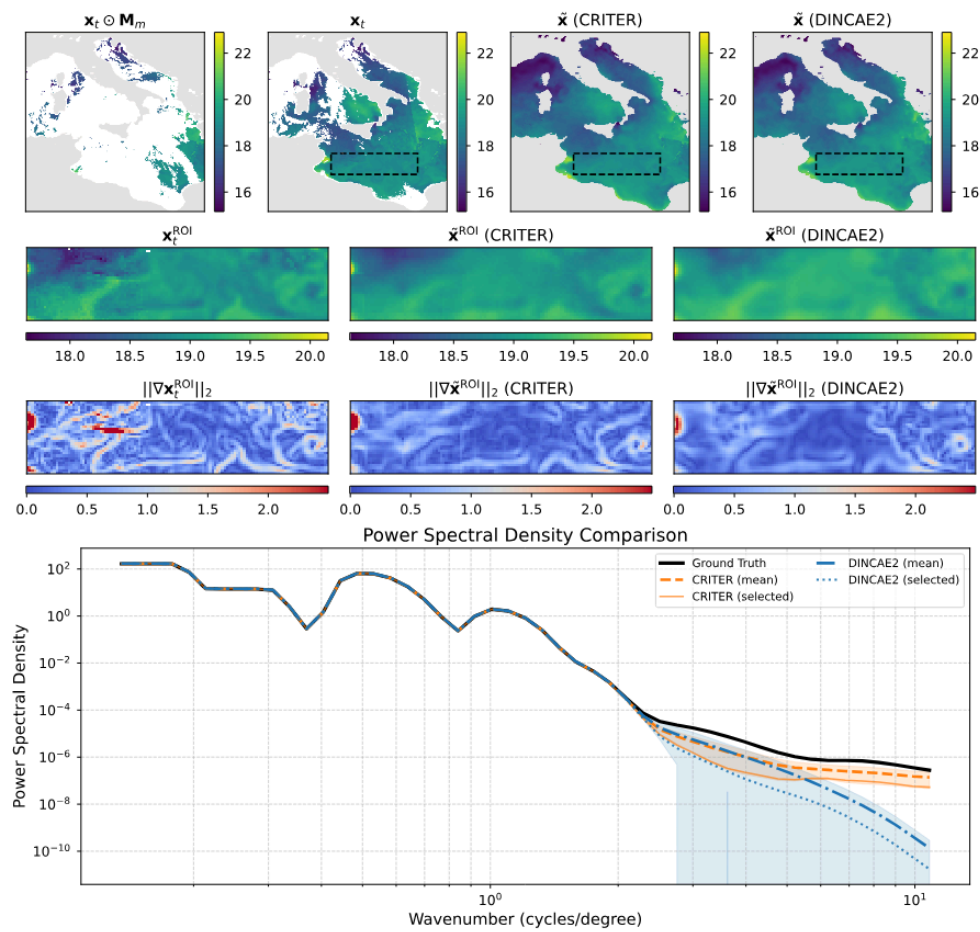

**Figure 8.** Same as Figure 7, but for another sample.

### C1 Extended Spatial Spectral Analysis

This section presents supplementary power spectral density (PSD) comparisons. Figure C1 shows a challenging case with sparse measurements where CRITER's PSD remains closer to the target (on average) for wavenumbers  $k \geq 4 \frac{\text{cycles}}{\text{deg}}$ . Figure C2 depicts a high-measurement scenario featuring a failure case for CRITER: minor noise amplification beyond  $k \geq 5 \frac{\text{cycles}}{\text{deg}}$ . A similar issue occurs with DINCAE2, but in a different wavenumber band: Figure C3 shows significant noise amplification within  $k \in [2, 4] \frac{\text{cycles}}{\text{deg}}$ . For a detailed discussion of the comparison, refer to Section 4.3.2.

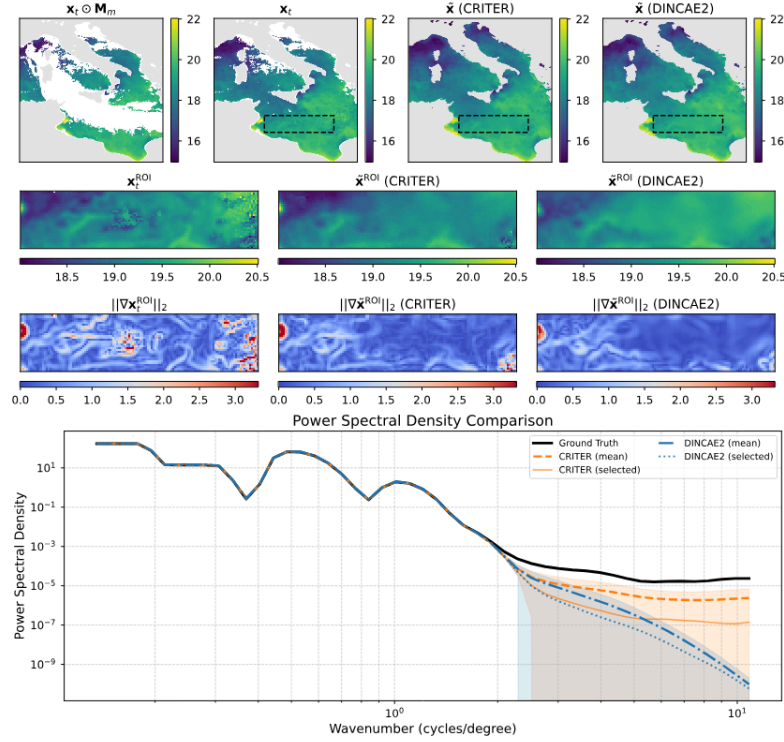

**Figure C1.** Same as Figure 7, but for a different sample.

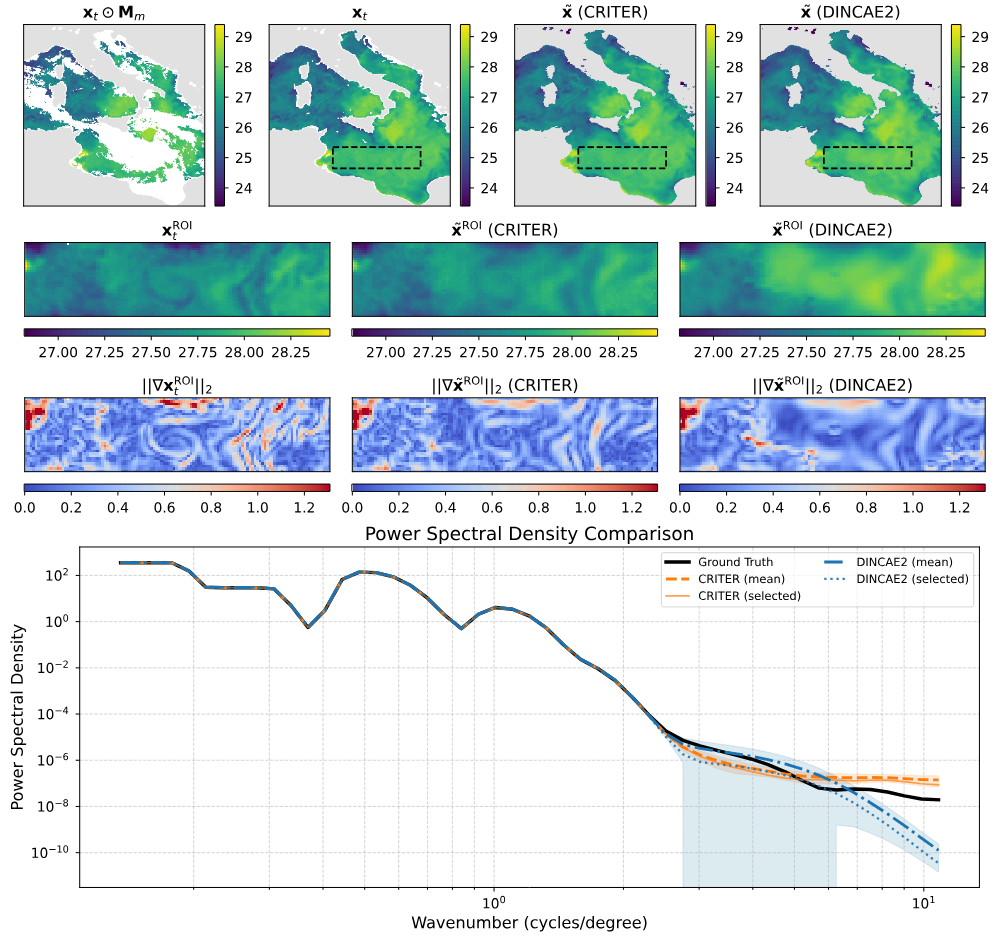

**Figure C2.** Same as Figure 7, but for a different sample.

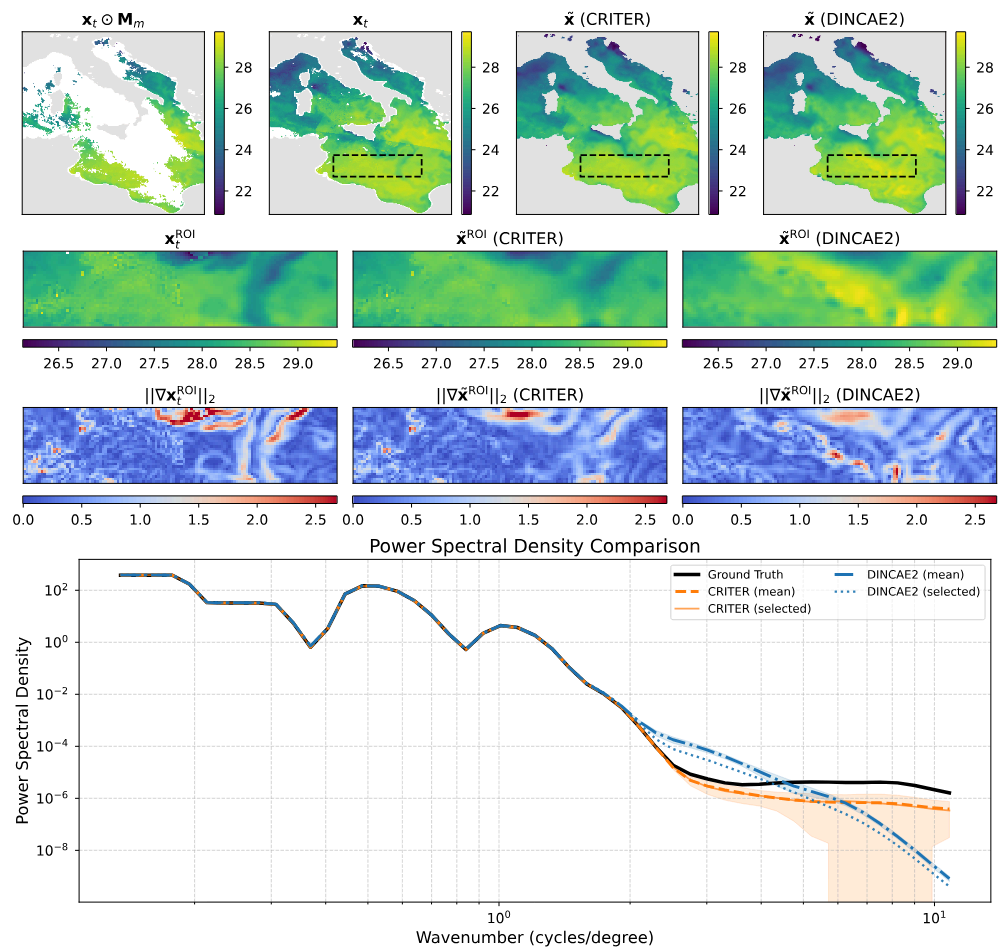

**Figure C3.** Same as Figure 7, but for a different sample.

**Comment 2:** In the introduction I think the authors are missing several papers that have dealt with the reconstruction of fine-scale features when satellite data are missing, mainly citing the papers published by a limited number of researchers. In particular, I think it should be important to consider at least:

Buongiorno Nardelli, B., Cavaliere, D., Charles, E., & Ciani, D. (2022). Super-resolving ocean dynamics from space with computer vision algorithms. *Remote Sensing*, 14(5), 1159.

Fanelli, C., Ciani, D., Pisano, A., & Buongiorno Nardelli, B. (2024). Deep learning for the super resolution of Mediterranean sea surface temperature fields. *Ocean Science*, 20(4), 1035-1050.

Lloyd, D. T., Abela, A., Farrugia, R. A., Galea, A., & Valentino, G. (2021). Optically enhanced super-resolution of sea surface temperature using deep learning. *IEEE Transactions on Geoscience and Remote Sensing*, 60, 1-14.

Martin, S. A., Manucharyan, G. E., & Klein, P. (2023). Synthesizing sea surface temperature and satellite altimetry observations using deep learning improves the accuracy and resolution of gridded sea surface height anomalies. *Journal of Advances in Modeling Earth Systems*, 15(5), e2022MS003589.

Martin, S. A., Manucharyan, G. E., & Klein, P. (2024). Deep learning improves global satellite observations of ocean eddy dynamics. *Geophysical Research Letters*, 51(17), e2024GL110059.

Young, C. C., Cheng, Y. C., Lee, M. A., & Wu, J. H. (2024). Accurate reconstruction of satellite-derived SST under cloud and cloud-free areas using a physically-informed machine learning approach. *Remote Sensing of Environment*, 313, 114339.

Moreover, I think authors should spend more words in the introduction explaining which are the limits of infrared measurements for SST data and which are the limits of using standard statistical techniques to reconstruct missing data in satellite images to motivate their paper.

## **Response 2:**

We've extended the introduction to cite the recommended papers. Please see the latexdiff below:



These can be categorized into two groups: (i) extensions of the Optimal Interpolation (OI) scheme (Taburet et al., 2019), (Ubelmann et al., 2021), and (ii) data-driven approaches ([Alvera-Azcárate et al., 2005](#)), ([Barth et al., 2020](#)), ([Barth et al., 2022](#)), ([Fablet et al., 2021](#)), ([Beauchamp et al., 2023](#)), ([Goh et al., 2024](#)). The latter includes methods based on Empirical Orthogonal Functions (EOFs), such as DINEOF (Alvera-Azcárate et al., 2005), and more recently, end-to-end deep learning techniques.

35 Notable deep learning methods include DINCAE1 (Barth et al., 2020), [dADRSR \(Buongiorno Nardelli et al., 2022; Fanelli et al., 2022; TS-RBFNN \(Young et al., 2024\)](#), DINCAE2 (Barth et al., 2022), 4DVarNet (Fablet et al., 2021), 4DVarNet-SSH (Beauchamp et al., 2023), [the SSH reconstruction method by Martin et al. \(2023\)](#), [NeurOST \(Martin et al., 2024\)](#), and MAESSTRO (Goh et al., 2024).

Traditional methods like DINEOF (Alvera-Azcárate et al., 2005) have been widely adopted, iteratively filling missing data

40 using truncated EOF decomposition. While effective for large-scale patterns, DINEOF struggles with fine-scale features, mostly because of their transient nature. Deep learning approaches have since emerged, surpassing traditional methods' performance. DINCAE1 (Barth et al., 2020) introduced a UNet-based (Ronneberger et al., 2015) model with probabilistic output, while 4DVarNet (Fablet et al., 2021) proposed an energy-based formulation for interpolation, achieving comparable SST reconstruction performance to a convolutional autoencoder architecturally similar to DINCAE1. [Recently, Young et al. \(2024\)](#)

45 [proposed a physically-informed neural network that reconstructs daily SSTs in both cloudy and cloud-free areas, outperforming DINEOF. Beyond gap-filling, super-resolution techniques have been developed to enhance SST resolution: Lloyd et al. \(2021\) designed a network that fuses optical and thermal satellite imagery, and more recently, Fanelli et al. \(2024\) applied a convolutional super-resolution network \(originally proposed by Buongiorno Nardelli et al. \(2022\)\) to super-resolve small low-resolution SST tiles obtained through optimal interpolation, improving fine-scale feature reconstruction.](#)

50 DINCAE2 (Barth et al., 2022), the current state-of-the-art and successor to DINCAE1, extended the original implementation with an additional refinement UNet. It operates on temporally consecutive partial SST observations, gradually improving central SST field reconstruction. However, its finite receptive field limits long-range spatio-temporal dependency exploitation, resulting in oversmoothed reconstructions lacking high-frequency details. Recently, MAESSTRO (Goh et al., 2024) addressed some limitations by adapting the Masked Autoencoder (MAE) (He et al., 2022) framework for SST reconstruction. It employs

55 a Vision Transformer (ViT) (Dosovitskiy et al., 2021) architecture to capture global spatial dependencies. However, its single-timestep approach neglects temporal correlations, potentially compromising reconstruction quality for large, contiguous cloud

---

occlusions. Furthermore, MAESSTRO's random patch masking strategy during training and evaluation may inadequately represent real cloud patterns, potentially yielding optimistic error estimates.

**Comment 3:** Section 2 starts stating that L3 SST observations will be used in the paper but they were never defined. Even if it seems obvious, it is a good practice to explain what L3 images are and which are their characteristics.

**Response 3:**

Thank you for pointing this out. We have now included a brief description of the L3 products so that the corresponding passage looks like this:

For our study we utilize Level 3 (L3) sea surface temperature (SST) satellite observation products. [L3 level of product refers to the satellite product where spatially sparse and irregular point observations of the ocean surface are gridded into a fixed grid across space and/or time. Such products may combine multiple satellite overpasses or even multiple sensors for the same observed quantity.](#)

Moreover, there is no explanation on the motivation of the choices of the datasets, especially about two things: (a) Why do the authors choose one Near Real Time (NRT) dataset and two

reprocessed/multi-years (MY) products? The processing chains behind these products can be very different and the datasets can differ among them. (b) Why do the authors choose for the Adriatic a different product with respect to the Mediterranean one (which includes entirely the Adriatic Sea)?

Thank you for pointing this out. There are two main reasons for using different datasets. First, we aimed for rigorous evaluation, analyzing CRITER's generalization capabilities over various datasets. Second, NRT products have higher resolution, while MY products have longer time span. Especially time span of MY products was something we wanted to test separately to gain access to a more significant training set, and - even more importantly - a larger test set, which ensures results rigor.

To address the reviewer's comment, we now explicitly point out the difference in used products and include the following passage into the revised manuscript:

1. *Central Mediterranean*: The SST\_MED\_SST\_L3S\_NRT\_OBSERVATIONS\_010\_012\_a (Med) dataset contains daily near real time (NRT) SST measurements over the Mediterranean sea from January 1, 2008 to December 31, 2021. ~~The are degree resolution of the measurements is~~ The dataset is provided on a remapped grid with a spatial resolution of  $(0.0625^\circ \times 0.0625^\circ)$ .
2. *Adriatic*: The SST\_MED\_PHY\_L3S\_MY\_010\_042 (Pisano et al., 2016; Casey et al., 2010) dataset contains daily multi-year reprocessed (MY) SST measurements over the Adriatic sea from August 25 1981 to December 31 2022. ~~The are degree resolution of the measurements is~~ The dataset is provided on a remapped grid with a spatial resolution of  $(0.05^\circ \times 0.05^\circ)$ .
3. *Atlantic*: SST\_ATL\_PHY\_L3S\_MY\_010\_038 (Pro) dataset contains daily multi-year reprocessed (MY) SST measurements from January 1, 1982 - January 1, 2022. ~~The are degree resolution of the measurements is~~ The dataset is provided on a remapped grid with a spatial resolution of  $(0.05^\circ \times 0.05^\circ)$ .

---

The geographic areas of the three datasets are shown in Figure 1. It is worth noting that two different satellite products are used in this study, a near-real-time (NRT) and a multi-year (MY) reprocessed dataset. This was done to show that like DINCAE2, CRITER also generalizes well across various datasets of SST. Furthermore, multi-year reprocessed datasets come at a higher resolution and span significantly longer periods of time, which gives access to a larger train and, more importantly, test set.

**Comment 4:** In Sec. 2.2.1 authors introduce the choice to select sequences of three days to construct the datasets for the training, can they explain the reason for this choice?

#### Response 4

The three-day sequence length is motivated by prior work (Barth et al. , 2020), which showed that optimal SST reconstruction is achieved with sequences of three days. Additionally, we found that three-day sequences optimize the performance-memory tradeoff of our method. Specifically: (1) Single-day observations proved insufficient for accurate reconstruction, especially in regions with large contiguous cloud cover; (2) three-day sequences provided sufficient information while maintaining manageable GPU memory usage during training. This is empirically supported by Table 5 (Performance of MAESSTRO and CRM), which shows that a Vision Transformer (ViT), using a sequence of three observations, achieves a 44% lower reconstruction error over deleted regions compared to the single-observation baseline. We have added a reference to Barth et al. 2020 to direct the reader to the original paper for further details on this manner.

**Comment 5:** In Sec. 2.2.2, it is not clear to me if the splitting between training/validation/test datasets is in chronological order (i.e., the test is always the last 5% of the temporal series) or they apply a shuffle before splitting the datasets.

**Response 5:** The datasets were split in strict chronological order, with the final 5% of the temporal series reserved as the test set. This approach ensures that the model is evaluated on future, unseen data (i.e., no temporal overlap between training and test phases), which is a standard practice for time-series analysis (Hyndman & Athanasopoulos, 2021). To clarify this, we have updated the text as seen on the latexdiff below.

#### 2.2.2 Train, validation and test datasets

100 The filtered satellite SST observations are [chronologically](#) split into three subsets: the train set, which comprises the first 90% of the samples, the validation set, which comprises the next 5% of the samples, and the test set, which consists of the last 5% of the samples. The models are trained on the train set, the hyper-parameters are tuned on the validation set, and the performance is assessed on the test set. [This approach ensures evaluation on future, unseen data with no temporal overlap between training and test phases.](#)

**Comment 6:** At the beginning of Sec. 3.3, authors state that the CRM part is “self-supervised” but then they define a loss function based on an error between the reconstruction and a “ground truth measurement”. If there is a target, then the network is not “self” supervised, but just supervised.

**Response 6:** In machine learning, specifically in computer vision, “self-supervised” typically refers to the fact that human-level-annotations are not required. For example, this is how masked autoencoders are used to train general-purpose backbones. Or how the classical DINOv2 backbone is trained (i.e., by automatically manipulating/perturbing data). In the context of CRM training, blocks of data are synthetically removed (e.g., simulating cloud cover), and the model is tasked with reconstructing the original, unobstructed data – the principle of masked-autoencoders. We do acknowledge, however, that the term “self-supervised” might not

be well established in the domain of geophysics, thus we have replaced it with “supervised with automatically generated targets” to avoid ambiguity.

**Comment 7:** Implementation details: How do authors choose  $N_{\text{IRM}}$ ? And the number of epochs?

**Response 7:** The number of refinement iterations  $N_{\text{IRM}}$  was determined through an ablation study on the Mediterranean dataset (See Sec 5.4.4). We observed that increasing  $N_{\text{IRM}}$  from 1 to 3 reduced the reconstruction error by 8%. However, beyond three iterations, performance degraded due to overfitting (since each additional iteration introduces a new residual estimation network). We therefore fix  $N_{\text{IRM}}=3$ , as this was the highest number of iterations, while not yet overfitting, and use it for all remaining datasets and experiments. To determine the number of epochs, we monitored the validation loss and found that training for 600 epochs ensured a consistent convergence across all three datasets. To clarify this, we have updated the text on implementation details, where we refer the reader to the respective ablation study in Section 5.4.4 for the choice of the number of iterations.

### 3.4 Implementation details

CRM (Section 3.1) consists of 12 encoder and decoder transformer blocks, with 3 multi-head attention (MHA) heads, a token dimension of  $D_t = 192$ , and a patch size of  $3 \times 8 \times 8$ , where 3 denotes the number of channels, while  $8 \times 8$  represents the width and height, respectively. IRM (Section 3.2) consists of a CNN-based encoder with 3 *double conv* blocks, each followed by a  $2 \times 2$  max pooling operation. The *double conv* block is composed of two  $3 \times 3$  convolutional layers, each followed by a batch normalization layer and a ReLU activation function. The number of convolutional kernels in each block is 32, 64, and 128, respectively. This is followed by another *double conv* block, with 256 kernels, at the bottleneck of the network, a Feature Fusion Module (FFM), and a decoder with 3 transpose convolution layers, each followed by a concatenation based skip connection and a *double conv* block. The number of kernels in each block is 128, 64, and 32, respectively. IRM utilizes  $N_{\text{IRM}} = 3$  refinement iterations – [this value is selected based on the results of the ablation study in Section 4.5.4](#). Hyperparameters  $\theta_1$  and  $\theta_2$  are set as  $\tilde{\theta}_1 = \ln(N_{\text{IRM}}) + \theta_1$  and  $\tilde{\theta}_2 = N_{\text{IRM}}\theta_2$  to ensure that the variance  $\sigma^2$  is bounded between  $1/\exp(\theta_1)$  and  $1/\theta_2$  for an arbitrary number of refinement iterations  $N_{\text{IRM}} \geq 1$ .

**Comment 8:** Regarding the performances: why do authors compute the average of the RMSE only for 10 reconstruction?

**Response 8:** Thank you for raising this important point. To clarify, the RMSE values in Table 1 are computed over *the entire test sets*—specifically, 256, 390, and 172 SST fields for the Mediterranean, Adriatic, and Atlantic datasets, respectively. To enhance the metric stability, we sample 10 distinct cloud masks *for each test* SST field, simulating realistic observational variability. We thus evaluate the performance on 2560, 3900, and 1720 masked SST fields for the respective regions, ensuring robust statistical validation. Our preliminary analysis showed that the performance measures are stable with even fewer cloud samples, but we used 10 for redundancy. We’ve updated the text (as shown on the latexdiff below) to make this more explicit.

The reconstruction error of visible regions is defined as

$$\text{RMSE}_{\text{vis}} = \sqrt{\frac{\sum_{i=1}^N [(\mathbf{x}_{t(i)} - \hat{\mathbf{x}}_{t(i)})^2 \mathbf{M}_{t(i)} \mathbf{M}_{l(i)} \mathbf{M}_{m(i)}]}{|\mathbf{M}_t \odot \mathbf{M}_l \odot \mathbf{M}_m|}}, \quad (7)$$

---

235 where  $|\mathbf{M}_t \odot \mathbf{M}_l \odot \mathbf{M}_m|$  is the number of visible ground truth measurements. ~~To improve the stability of the measures, all RMSE measures are computed as the average of the RMSEs computed for 10 reconstructions obtained by sampling ten different binary masks  $\mathbf{M}_m$ .~~ To enhance the metric stability, we sample 10 distinct cloud masks for each test SST field, simulating realistic observational variability. We thus evaluate the performance on 2560, 3900, and 1720 masked SST fields for the respective regions, ensuring robust statistical validation.

**Comment 9:** Row 204: Authors state that DINCAE2 is the “best SST reconstruction method” but it seems to me that this is more of an opinion and that they have not tested all the methods available in the literature to state something like that.

**Response 9:** We appreciate the reviewer’s comment and agree that our original wording may have conveyed an unintended sense of overgeneralization. In interest of modesty and to avoid a possible overstatement, we have rephrased the text to: “*DINCAE2 is a well-known and highly competitive SST reconstruction method, serving as a widely recognized benchmark in recent studies (Barth et al., 2024).*”

**Comment 10:** Rows 210-212: It is not clear to me how authors can assess that the MAESSTRO network is limited due to the single step approach, can you please elaborate this sentence?

**Response 10:** The limitation arises because a single time step (single-day) input provides insufficient context to infer missing SST values in regions with large contiguous cloud cover. For example, if clouds obscure >75% of the region, the sparse remaining measurements make reconstruction highly ambiguous. By extending the input to a three-day sequence, the model gains access to additional spatio-temporal patterns from adjacent days. This multi-day approach increases the available information, as demonstrated in Table 5 (“Performance of MAESSTRO and CRM”): switching from single-day to three-day inputs reduces reconstruction error by 44%. Furthermore, this limitation is observed by the authors of MAESSTRO (Goh et al. 2024). Please refer to Figure 11 in <https://doi.org/10.5194/os-20-1309-2024>, which shows a significant degradation in reconstruction quality in the presence of a large realistic cloud.

**Comment 11:** I do not understand the difference between the “RMSE\_all” of Table 1 and row 225 (it seems to me that it is calculated over the entire tested dataset) and the “RMSE\_all” above the plots in Figs. 4, 5, 6 and the analogous in Appendix. There has to be different definitions since the values are different but, therefore, the name should change. It is also strange that all the values “RMSE\_all” in the plots are larger than the average in Table 1, are the authors showing the worst outcomes? Moreover, in general Sec. 5.2.1 presents some issues: there are a lot of small panels and only 10 lines of comments of what the images are revealing. I suggest choosing fewer samples and enlarging the size of the images that are significant in order to appreciate the differences between SST fields. Moreover, I suggest changing the colormap for the variance and the RMSE since it is almost impossible to appreciate the variations.

**Response 11:** Thank you for identifying this ambiguity. You are correct that the term “RMSE\_all” appears in multiple contexts with different values. The exact definition of RMSE\_all is given in Sec 5.1 (Performance measures). In Table 1 the mean RMSE\_all (computed over the entire test set) is reported, while in Figures 4, 5, and 6 (and Appendix) the RMSE\_all for the selected SST fields is shown. We have updated the table caption to explicitly state that presented metrics are averaged over the entire test set.

The higher RMSE values in the figures compared to Table 1 reflect our intentional focus on most challenging examples (as the reviewer correctly assumed), where reconstruction is inherently difficult. These cases were selected to highlight scenarios where CRITER’s improvements over DINCAE2 are most pronounced.

We thank the reviewer for the valuable suggestion. In response, we have revised the figures to reduce the number of samples and enlarge the most significant images, improving the visibility of differences in the SST fields. Additionally, we have updated the colormaps for both variance ( $\sigma$ ) and RMSE to enhance perceptual clarity.

Please see an example of the new figures below. Other figures along with a more detailed account of the changes, including how we addressed the issue of comparability and color scale saturation, is provided in our response to Reviewer 1, Comment 7.



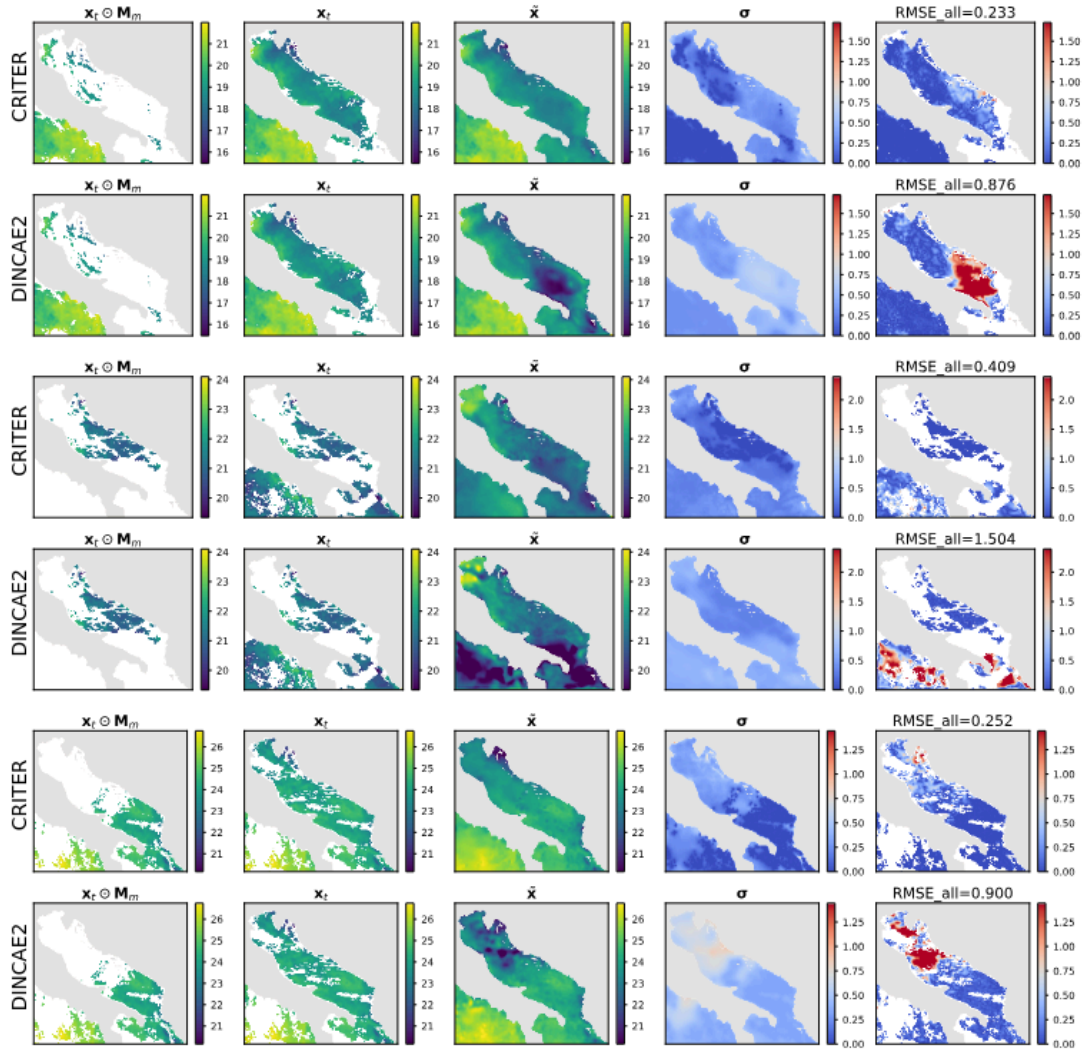

**Figure 5.** Same as Figure 4, but for the Adriatic domain.

**Comment 12:** In general Fig. 4,5, 6 and similar (after a very big zoom) shows a not homogeneous SST field, where the changes in the effective resolution of the SST field due to the network's reconstruction is very clear. Can authors please comment on this issue?

**Response 12:** The inhomogeneity in spatial resolution (i.e., the difference in sharpness) between cloud-free and cloud-obscured regions is an expected outcome of our reconstruction framework. In cloud-free regions the model preserves fine details, ensuring minimal distortion of the original input data. In contrast, obscured regions require the model to infer missing SST values using spatio-temporal context from adjacent days / pixels. These reconstructed regions exhibit reduced sharpness due to the inherent uncertainty caused by sparse observations. Our model, therefore, better preserves the original data from visible regions and more accurately

reconstructs the missing observations compared to DINACE2 and MAESSTRO. We've updated the text in Section 4.3.1. (as shown on the latexdiff below) explaining the reason behind this observation.

#### 4.3.1 Qualitative comparison

For further insights we visualize the CRITER and DINCAE2 reconstructions in Figure 4 and Figure 5. We showcase examples from the Mediterranean and the Adriatic test set, respectively, highlighting the masked SST ( $\mathbf{x}_t \odot \mathbf{M}_m$ ), target SST ( $\mathbf{x}_t$ ),  
265 full reconstruction ( $\tilde{\mathbf{x}}$ ), ~~variance ( $\sigma^2$ )~~ standard deviation ( $\sigma$ ), and RMSE computed over the entire target ( $\text{RMSE}_{\text{all}}$ ). ~~Note that~~  
~~CRITER~~ Notice that CRITER preserves fine details in cloud-free regions, ensuring minimal distortion of the original input data. In contrast, obscured (deleted) regions require the model to infer missing SST values using spatio-temporal context from adjacent days / pixels. These reconstructed regions exhibit reduced sharpness as a result of the inherent uncertainty caused by sparse observations. However, CRITER demonstrates an excellent ability to reconstruct high-frequency components of the  
270 target SST under deleted regions compared to DINCAE2. Additionally, CRITER proves robust to clouds of arbitrary shape, whether small and scattered (Figure 4, first and last comparison) or large and contiguous (Figure 4, second and third comparisons). Similar observations can be drawn from the comparisons on the Adriatic dataset presented in Figure 5. On the Atlantic test set, both models face challenges in reconstructing high-frequency components under deleted regions, as illustrated in Figure 6. However, we observe that CRITER is able to preserve the SST measurements over visible regions whereas DINCAE2  
275 introduces significant smoothing. Additional comparison Figures are shown in the Appendix (Figures B1, B2 and B3).



**Comment 13:** Throughout the paper, the significance interval for errors is missing. Please, show them to ensure that the differences between methods are relevant.

**Response 13:** We thank the reviewer for raising this important point. Following Barth et al. (2021), we now report both the mean error and the 10%/90% percentiles of the error distribution, providing a more comprehensive characterization of the expected error range. Specifically, we have updated Table 1 (“Comparison with state-of-the-art”) and Figure 9 (“Comparison under different cloud coverage levels”), as seen on the latediffs below.

**Table 1.** Comparison of CRITER, DINCAE2 and MAESTRO. We report the overall reconstruction error ( $RMSE_{all}$ ), as well as the error over deleted ( $RMSE_{mis}$ ) and observed regions ( $RMSE_{vis}$ ), where the two numbers in parentheses correspond to the 10% and 90% percentiles of the error.

| Dataset       | Model         | $RMSE_{all}$ ( $^{\circ}C$ ) | $RMSE_{mis}$ ( $^{\circ}C$ ) | $RMSE_{vis}$ ( $^{\circ}C$ ) |
|---------------|---------------|------------------------------|------------------------------|------------------------------|
| Mediterranean | MAESTRO       | 0.487 (0.320, 0.657)         | 0.607 (0.394, 0.856)         | 0.434 (0.299, 0.564)         |
|               | DINCAE2       | 0.209 (0.140, 0.300)         | 0.319 (0.226, 0.418)         | 0.148 (0.112, 0.184)         |
|               | CRITER (ours) | <b>0.127 (0.037, 0.235)</b>  | <b>0.255 (0.168, 0.352)</b>  | <b>0.017 (0.013, 0.021)</b>  |
| Adriatic      | MAESTRO       | 0.456 (0.296, 0.635)         | 0.583 (0.362, 0.844)         | 0.392 (0.261, 0.539)         |
|               | DINCAE2       | 0.270 (0.111, 0.522)         | 0.433 (0.203, 0.769)         | 0.106 (0.087, 0.129)         |
|               | CRITER (ours) | <b>0.130 (0.045, 0.222)</b>  | <b>0.243 (0.140, 0.358)</b>  | <b>0.021 (0.014, 0.030)</b>  |
| Atlantic      | MAESTRO       | 0.802 (0.508, 1.239)         | 0.832 (0.514, 1.301)         | 0.764 (0.479, 1.137)         |
|               | DINCAE2       | 0.444 (0.332, 0.581)         | 0.525 (0.396, 0.692)         | 0.302 (0.236, 0.364)         |
|               | CRITER (ours) | <b>0.391 (0.249, 0.542)</b>  | <b>0.518 (0.386, 0.692)</b>  | <b>0.036 (0.019, 0.046)</b>  |

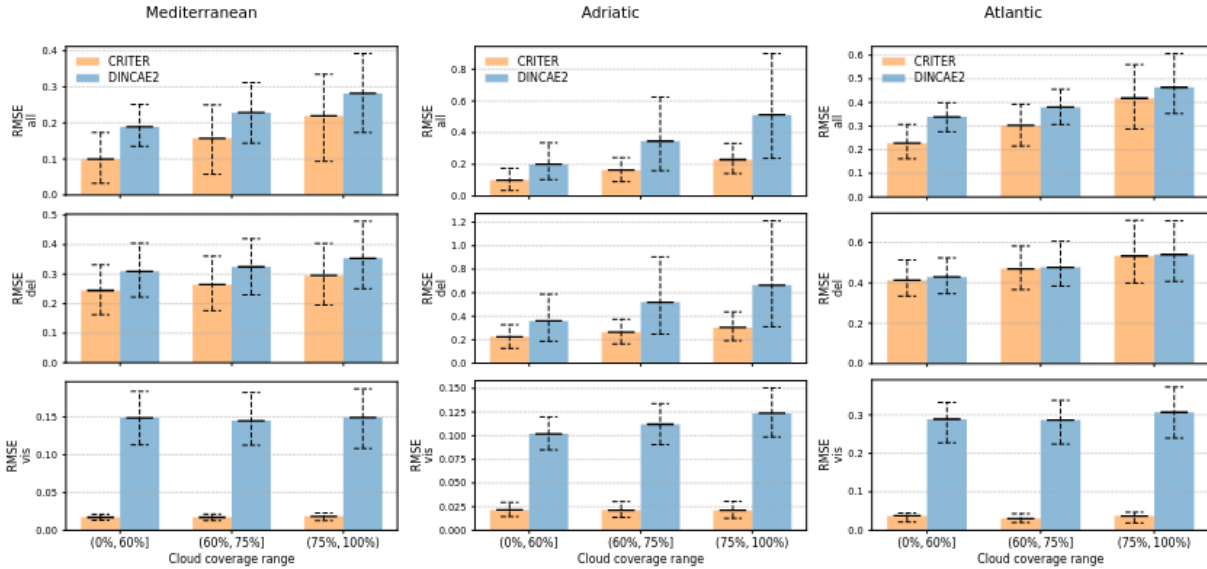

**Figure 9.** Reconstruction error comparison between CRITER and DINCAE2 across different cloud coverage groups (low, moderate, and high) on the Mediterranean, Adriatic, and Atlantic test sets. The three rows correspond to the RMSE computed over: (1) all ground truth measurements, (2) missing measurements, and (3) observed measurements. The error bars indicate the 10% percentile, mean, and 90% percentile of the error, respectively.

We hope this addresses the reviewer’s concerns.

Technical corrections

**Comment 14:** Rows 18-19 page 1: Eliminate after “...approaches” the references “(Alvera-Azcarate et al., 2005), (Barth et al., 2020), (Barth et al., 2022), (Fablet et al., 2021), (Beauchamp et al., 2023), (Goh et al., 2024)”. Authors already recall all of those, specifying the techniques used, in next rows.

**Response 14:** As suggested, we have removed the redundant references on page 1 (lines 18–19).

**Comment 15:** Section 2.1: (a) The way to present the datasets is incorrect. There is a standard way to cite products from the Copernicus Marine Service that can be found here: <https://help.marine.copernicus.eu/en/articles/4444611-how-to-cite-copernicus-marine-products-and-services>. (b) The sentence “The arc degree resolution of the measurements...” is incorrect for two reasons. First, the L3S products are merged multi-sensors products which are not at the original resolution of the data measured by the sensors, but remapped on a grid at a chosen resolution. Therefore, the products’ resolutions are 0.0625° or 0.05°, not the measurements. Moreover, it is redundant to say “arc degree resolution”, it is “spatial resolution” or “0.05° resolution”. (c) Authors state that product X “contains” from day Y to day Z. Actually, all the products used include temporal series longer (and spatial coverage bigger) than the one stated in this section, so authors should either present the whole temporal series (coverage) or explain why they chose only that temporal (spatial) part.

**Response 15:**

Thanks for these remarks. The manuscript has been revised accordingly to address points (a) and (b).

Regarding point (c), we limited the spatial and temporal coverage of each dataset primarily due to memory constraints during model training. The choice of datasets was partly determined by the following considerations. Adriatic basin was chosen because it is the basin the authors are familiar with and because it is an elongated semi-enclosed basin with consequently poorer satellite coverage. This yields Adriatic basin as a challenging reconstruction problem. Furthermore, this basin - together with the central Mediterranean - is the region of training of the original DINCAE 2.0 paper (Barth et al., 2021), which is why we cropped the *Mediterranean Sea - High Resolution and Ultra High Resolution L3S Sea Surface Temperature* dataset to focus on the Central Mediterranean region. Additionally, the selected region contains areas with distinct dynamical behaviors—from northern Adriatic with persistent zonal temperature and salinity fronts and meridional mesoscale temperature gradients to the much deeper Ionian Sea shows high variability between its eastern and western parts (Fanelli et al., 2024).

*European North West Shelf/Iberia Biscay Irish Seas – High Resolution ODYSSEA Sea Surface Temperature Multi-sensor L3 Observations* dataset was restricted to the Northwestern Ireland / North Atlantic region because this region of essentially open Atlantic ocean is substantially

different from the enclosed central Mediterranean and Adriatic basin. Furthermore, its frequent cloud cover poses a significant challenge for reconstruction methods.

This approach allowed us to manage computational demands while concentrating on relevant and oceanographically distinct regions. The regions could also be chosen from other parts of the global ocean but we believe that the choice of the regions in this paper is adequate to demonstrate that CRITER generalizes well to quite different regimes of surface temperatures. We hope this clarifies our rationale.

We've updated the manuscript to reflect these points. Please see the corresponding latexdiff below.

## 2 Input data: Sea surface temperature

### 2.1 Evaluation datasets

70 For our study we utilize Level 3 (L3) sea surface temperature (SST) satellite observation products. L3 level of product refers to the satellite product where spatially sparse and irregular point observations of the ocean surface are gridded into a fixed grid across space and/or time. Such products may combine multiple satellite overpasses or even multiple sensors for the same observed quantity.

Specifically we consider the following three datasets corresponding to three different geographic regions:

- 75 1. *Central Mediterranean*: The SST\_MED\_SST\_L3S\_NRT\_OBSERVATIONS\_010\_012\_a (Med) dataset contains daily near real time (NRT) SST measurements over the Mediterranean sea from January 1, 2008 to December 31, 2021. ~~The are degree resolution of the measurements is~~ The dataset is provided on a remapped grid with a spatial resolution of  $(0.0625^\circ \times 0.0625^\circ)$ .
- 80 2. *Adriatic*: The SST\_MED\_PHY\_L3S\_MY\_010\_042 (Pisano et al., 2016; Casey et al., 2010) dataset contains daily multi-year reprocessed (MY) SST measurements over the Adriatic sea from August 25 1981 to December 31 2022. ~~The are degree resolution of the measurements is~~ The dataset is provided on a remapped grid with a spatial resolution of  $(0.05^\circ \times 0.05^\circ)$ .
- 85 3. *Atlantic*: SST\_ATL\_PHY\_L3S\_MY\_010\_038 (Pro) dataset contains daily multi-year reprocessed (MY) SST measurements from January 1, 1982 - January 1, 2022. ~~The are degree resolution of the measurements is~~ The dataset is provided on a remapped grid with a spatial resolution of  $(0.05^\circ \times 0.05^\circ)$ .

---

These regions were chosen due to their oceanographic variety. Adriatic is an elongated semi-enclosed basin with correspondingly poor satellite coverage. Central Mediterranean exhibits a wide variety of oceanographic regimes (from regions of freshwater influence in the northern Adriatic to a much deeper Ionian where Levantine and Adriatic water masses communicate), while Atlantic region is essentially an open ocean region, very different from the Adriatic. These regions should demonstrate

90 generalization abilities of CRITER under a variety of oceanographic conditions. The geographic areas of the three datasets are shown in Figure 1. It is worth noting that two different satellite products are used in this study, a near-real-time (NRT) and a multi-year (MY) reprocessed dataset. This was done to show that like DINCAE2, CRITER also generalizes well across various datasets of SST. Furthermore, multi-year reprocessed datasets come at a higher resolution and span significantly longer periods of time, which gives access to a larger train and, more importantly, test set.

470 *Acknowledgements.* The authors would like to thank the Academic and Research Network of Slovenia - ARNES and the Slovenian National Supercomputing Network - SLING consortium (ARNES, EuroHPC Vega - IZUM) for making the research possible by using their super-computer clusters. This study has been conducted using E.U. Copernicus Marine Service Information; <https://doi.org/10.48670/moi-00171>, <https://doi.org/10.48670/moi-00310>.

**Comment 16:** The word “occluded” in the title of Section 2.2.1 sounds strange, the common way to define it is “missing” or similar.

**Response 16:** We agree that 'occluded' was suboptimal terminology. The section title has been revised to 'Filtering out days with excessive cloud coverage' for greater precision.

**Comment 17:** At row 82, authors introduce W and H as dimensions but they never defined them.

**Response 17:** Thank you for pointing this out. We’ve added a sentence defining width (W) and height (H).

**Comment 18:** Fig. 2: the caption should explain every variable in the image.

**Response 18:** As suggested, we updated the caption to explain all variables involved. For convenience, we paste the figure here.

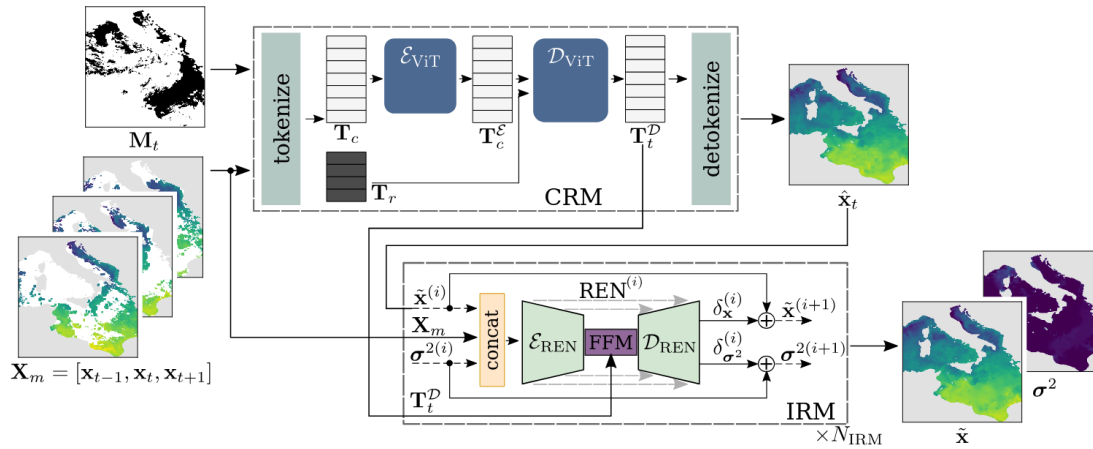

**Figure 2.** Given observations for three consecutive days  $[\mathbf{x}_{t-1}, \mathbf{x}_t, \mathbf{x}_{t+1}]$  and a binary mask  $\mathbf{M}_t$  indicating missing pixels, CRITER densely reconstructs  $\mathbf{x}_t$  in two phases. First, the CRM module estimates a coarse reconstruction  $\hat{\mathbf{x}}_t$ , which the IRM module then iteratively refines to produce the final reconstruction  $\tilde{\mathbf{x}}$  and uncertainty  $\sigma^2$ . CRM tokenizes the input into tokens requiring reconstruction  $\mathbf{T}_r$  and contextual tokens  $\mathbf{T}_c$ . These contextual tokens are encoded by a ViT-based encoder into  $\mathbf{T}_c^e$ , combined with  $\mathbf{T}_r$ , and decoded by a ViT-based decoder into decoded tokens  $\mathbf{T}_t^D$ , which are finally mapped to  $\hat{\mathbf{x}}_t$ . In the IRM module, dashed lines indicate the iterative refinement process. At each iteration  $i$ , the current reconstruction estimate  $\tilde{\mathbf{x}}^{(i)}$  and uncertainty estimate  $\sigma^{2(i)}$  are refined by adding the predicted residuals: reconstruction residual  $\delta_{\mathbf{x}}^{(i)}$  and uncertainty residual  $\delta_{\sigma^2}^{(i)}$ . The index in  $\mathcal{R}EN^{(i)}$  indicates the change in network parameters in each iteration.

**Comment 19:** Row 94: The use of trigonometric functions for the day of the year is a common procedure to take into account the seasonality of SST, it was not proposed by Barth et al. (2020).

**Response 19:** Thank you, we have removed the citation.

**Comment 20:** Row 96: Authors never define  $\mathbf{D}_t$ .

**Response 20:** We have revised Section 3.1 (as seen on latexdiff below) to explicitly define “D<sub>t</sub>” as the dimension of the tokens used in the Vision Transformer (ViT) blocks.

### 3.1 Coarse reconstruction module (CRM)

115 The coarse reconstruction module (CRM, Figure 2) follows the ViT encoder-decoder architecture (Dosovitskiy et al., 2021), similar to spatio-temporal MAE (Feichtenhofer et al., 2022). The input observation fields  $\mathbf{X}_m = [\mathbf{x}_{t-1}, \mathbf{x}_t, \mathbf{x}_{t+1}] \in \mathbb{R}^{3 \times 1 \times W \times H}$  are first fed to a tokenization process. To encode information about the yearly temperature cycle, each observation field  $\mathbf{x}_t$  is concatenated channel-wise with a day-of-the-year auxiliary tensor  $\mathbf{a}_t = [\sin(d_t \frac{2\pi}{365}), \cos(d_t \frac{2\pi}{365})] \in \mathbb{R}^{2 \times W \times H}$ , **proposed by Barth et al. (2020)**, where the two channels contain constants and  $d_t$  is the numerical day of year index (between 1 and 365).

120 The resulting fields are split into non-overlapping  $3 \times 8 \times 8$  patches which are then flattened and linearly projected into **a-tokens of shape  $1 \times D_t$** ~~dimensional token~~, **where  $D_t$  is the dimension of tokens used in ViT blocks**, thus creating the list of tokens  $\mathbf{T} = \{\mathbf{T}_r, \mathbf{T}_c\}$ . Tokens  $\mathbf{T}_r$  correspond to patches in  $\mathbf{x}_t$  with at least one unobserved pixel, and thus have to be reconstructed. Tokens  $\mathbf{T}_c$  are the remaining tokens and they are used as a context for reconstruction. To encode the extent of missing values in a token, all tokens in  $\mathbf{x}_t$  are summed with their corresponding mask tokens. These are obtained by splitting the binary mask

125 indicating missing pixels  $\mathbf{M}_t \in \{0, 1\}^{W \times H}$  into  $8 \times 8$  non-overlapping patches, which are then flattened and projected into mask tokens of shape  $1 \times D_t$ . To maintain the necessary spatio-temporal location of each token, all tokens in  $\mathbf{T}$  are summed with a spatio-temporal positional embedding as in Feichtenhofer et al. (2022).

6

**Comment 21:** Row 107: To be consistent throughout the paper, “ $1 \times 8^2$ ” should be “ $1 \times 8 \times 8$ ”.

**Response 21:** The original shape “ $1 \times 8^2$ ” of the output (*flattened*) token was intentional, since tokens are vectors; in this case of dimension “ $1 \times 64$ ”. At the output, they are reshaped into spatial “ $1 \times 8 \times 8$ ” grids (patches).

**Comment 22:** Row 148: When authors state “...number of ground truth measurements “that are not on land”, it confuses me. By definition, if we are talking about SEA surface temperature measurements, they are not on land

**Response 22:** We apologize for the lack of clarity in this sentence. You are absolutely correct that SST measurements are, by definition, recorded over the ocean and not on land. The phrase “*that are not on land*” was redundant and unintentionally confusing. We have removed it.

**Comment 23:** Row 149: “M<sub>I</sub> (·)<sub>(i)</sub>” should be “M<sub>I</sub>(i) (·)”.

**Response 23:** We recognize that the original formatting created ambiguity between the mask “M<sub>I</sub>” and the indexing operator “(·)<sub>(i)</sub>”. To resolve this, we have restructured the text to explicitly separate the two notations. Please see the latexdif below.



180 by copying clouds from a random day not included in the triplet to maintain mask simulation realism. CRM is trained to minimize the following reconstruction error:

$$\mathcal{L}_{\text{CRM}} = \frac{1}{|\mathbf{M}_t \odot \mathbf{M}_l|} \sum_{i=1}^N [(\mathbf{x}_{t(i)} - \hat{\mathbf{x}}_{t(i)})^2 \mathbf{M}_{t(i)} \mathbf{M}_{l(i)}], \quad (3)$$

where  $\hat{\mathbf{x}}_t$  is the coarse reconstruction generated by CRM, mask  $\mathbf{M}_t$  has zeros at locations where ground truth measurements within the observation field  $\mathbf{x}_t$  are missing, while  $\mathbf{M}_l$  has zeros at spatial locations belonging to land,  $|\mathbf{M}_t \odot \mathbf{M}_l|$  denotes the  
185 number of ground truth measurements ~~that are not on land~~. The summation goes over the  $N$  pixels in each of  $\mathbf{x}_t$ ,  $\hat{\mathbf{x}}_t$ ,  $\mathbf{M}_t$  and  $\mathbf{M}_l$ . ~~The operator  $(\cdot)_{(i)}$  is an indexing operator that indexes the  $i$ -th element of a matrix.~~ The consecutive observations used as the model input and the masks  $\mathbf{M}_t$ ,  $\mathbf{M}_l$ ,  $\mathbf{M}_m$  used in the training process are visualized in Figure 3.

**Comment 24:** Fig. 3: Colorbar are missing, even if it is not the intent of the image to show specific values of SST, they should be included, especially for the masks

**Response 24:** As suggested, we added the colorbar to SST and mask images in Figure 3.

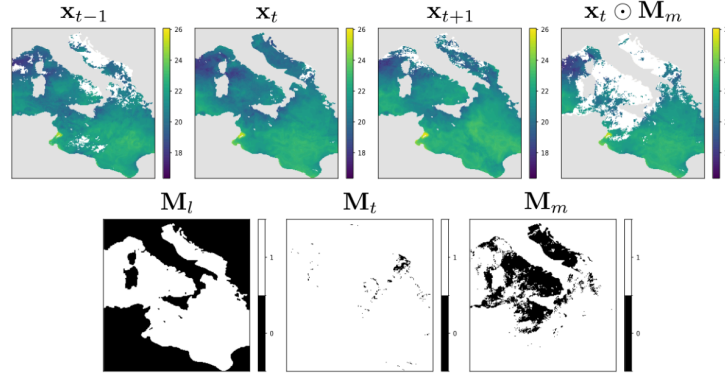

**Figure 3.** (Top row) A sequence of three consecutive observation fields  $\mathbf{x}_{t-1}$ ,  $\mathbf{x}_t$ ,  $\mathbf{x}_{t+1}$  and the central observation  $\mathbf{x}_t \odot \mathbf{M}_m$ , with additional missing values, deleted by the sampled mask  $\mathbf{M}_m$ . (Bottom row) The land mask  $\mathbf{M}_l$  with zeros at land locations, the missing data mask  $\mathbf{M}_t$  with zeros at locations with missing measurements in  $\mathbf{x}_t$ , and  $\mathbf{M}_m$ , which is a randomly sampled  $\mathbf{M}_t$  from an observation field not included in the input.

**Comment 25:** Rows 185-187: This sentence has been already stated before, no need to repeat. Also all the definitions of the matrices.

**Response 25:** Thank you for spotting this redundancy. We have removed the duplicate sentence in rows 185–187.

**Comment 26:** Row 207: Please specify what does it mean “under the same conditions”, i.e., datasets, hyperparameters, number of epochs...

**Response 26:** The phrase “*under the same conditions*” means that all models were trained using the same dataset splits, with hyperparameters tuned on the validation set, and the same loss function computed over the same regions as CRITER. In the case of MAESSTRO, some architectural modifications were necessary to ensure comparability. Specifically, we replaced MAESSTRO’s original random patch masking with sampled real cloud masks to align with our

evaluation protocol. Additionally, all models were evaluated on the identical test set using the same set of sampled cloud masks. These procedures and settings are fully detailed in Appendix C1 (Implementation Details of Baseline Models), to which we have added a cross-reference for clarity and reproducibility. We have updated the text to clarify this. Please see the latexdiff below.

4.3 Comparison with state-of-the-art

We compare CRITER with ~~currently the best~~ DINCAE2 (Barth et al., 2022), a well-known and highly competitive SST recon-  
struction method ~~DINCAE2 (Barth et al., 2022)~~, serving as a widely recognized benchmark in recent studies (Barth et al., 2024)  
and with the recently presented MAESSTRO (Goh et al., 2024) on the three datasets from Section 2.1. We reimplemented  
both DINCAE2 (originally in Julia) following Barth et al. (2022) and MAESSTRO (public implementation unavailable) fol-  
lowing Goh et al. (2024) in Pytorch. ~~Both~~ To ensure a fair evaluation, both methods were trained ~~under the same conditions~~  
~~as CRITER to ensure a fair evaluation, using the same dataset splits, with tuned hyperparameters, and employed the same loss~~  
function computed over identical regions to CRITER. For MAESSTRO, architectural modifications were necessary to ensure  
comparability. Please refer to Appendix D1 for the implementation details of baseline models.

**Comment 27:** Row 263: I think a “C” is missing when referring to degree Celsius.

**Response 27:** Thank you for catching this oversight. We have updated the text to include the missing “C” for Celsius in line 263.

**Comment 28:** Caption of Table 2: what authors mean with “both dimensionless and bias in °C”. What is dimensionless?

**Response 28:** Thank you for your question — the term was used incorrectly. We meant *unitless*. By “dimensionless” we meant to indicate that the scaled error metric “ $\epsilon_i$ ” lacks physical units as they cancel out. Consequently, its mean (“ $\mu_{\epsilon_i}$ ”) and standard deviation (“ $\sigma_{\epsilon_i}$ ”) are unitless. We have thus changed the term “dimensionless” into “unitless”. Furthermore, we identified an error in Table 2 where the units for “ $\mu_{\epsilon_i}$ ” and “ $\sigma_{\epsilon_i}$ ” were incorrectly specified. This has been corrected by denoting these unitless quantities with a “/” in the table’s unit column. Please see the latexdiff below.

**Table 2.** Comparison of CRITER and DINCAE2 on each test set, showing the mean of the scaled error ( $\mu_{\epsilon}$ ), standard deviation of the scaled error ( $\sigma_{\epsilon}$ ) ~~both dimensionless~~ unitless and bias in °C.

| Dataset       | Model         | $\mu_{\epsilon}$ ( <u>°C/</u> ) | $\sigma_{\epsilon}$ ( <u>°C/</u> ) | bias (°C)     |
|---------------|---------------|---------------------------------|------------------------------------|---------------|
| Mediterranean | DINCAE2       | -0.060                          | 0.334                              | -0.060        |
|               | CRITER (ours) | -0.022                          | <b>1.116</b>                       | <b>-0.007</b> |
| Adriatic      | DINCAE2       | 0.198                           | <b>0.996</b>                       | 0.128         |
|               | CRITER (ours) | 0.041                           | 1.082                              | <b>0.007</b>  |
| Atlantic      | DINCAE2       | -0.017                          | 0.801                              | <b>-0.006</b> |
|               | CRITER (ours) | 0.118                           | <b>1.156</b>                       | 0.047         |
